# Supplementary material for: The moderating and mediating role of eating behaviour traits in acceptance and commitment therapy-based weight management interventions: protocol for an individual participant data meta-analysis
Source: HighWire-hosted journal article supplement (doi:10.1136/bmjopen-2023-076411), 2023-12-01
Supplement: bmjopen-2023-076411supp001_data_supplement.pdf [file bmjopen-2023-076411supp001_data_supplement.pdf]

# **The Moderating and Mediating Role of Eating Behaviour Traits in Acceptance and Commitment Therapy-based Weight Management Interventions: Protocol for an Individual Participant Data Meta-analysis**

## **[SUPPLEMENTARY MATERIAL]**

Laura Kudlek <sup>a\*</sup>, Julia Mueller <sup>a</sup>, Patricia Eustacio Colombo <sup>a</sup>, Stephen J. Sharp <sup>a</sup>, Simon J Griffin <sup>a, b</sup>, Amy Ahern <sup>a</sup>

<sup>a</sup> MRC Epidemiology Unit, School of Clinical Medicine, University of Cambridge, Cambridge, United Kingdom

<sup>b</sup> Primary Care Unit, Department of Public Health and Primary Care, University of Cambridge, Cambridge, United Kingdom

\* Corresponding author, email: [laura.kudlek@mrc-epid.cam.ac.uk](mailto:laura.kudlek@mrc-epid.cam.ac.uk)

Contents

|                                       |   |
|---------------------------------------|---|
| 1.0 SEARCH STRATEGY                   | 3 |
| 1.1 MEDLINE via Ovid                  | 3 |
| 1.2 EMBASE via Ovid                   | 3 |
| 1.3 AMED via Ovid                     | 3 |
| 1.4 CENTRAL via Cochrane              | 4 |
| 1.5 ASSIA via ProQuest                | 4 |
| 1.6 PSYCINFO via ProQuest             | 5 |
| 1.7 WEB OF SCIENCE via web of science | 5 |
| 1.8 CINAHL via EBSCOhost              | 5 |
| 2.0 DATA EXTRACTION FORM              | 6 |
| 2.1 Top-line details                  | 6 |
| 2.2 Study characteristics             | 6 |
| 2.2.1 Methods                         | 6 |
| 2.2.2 Notes                           | 6 |
| 2.2.3 Participants (at baseline)      | 7 |
| 2.2.4 Interventions                   | 7 |
| 2.3 Mediators/Moderators/Outcomes     | 8 |

## 1.0 Search Strategy

We screened studies included in a review by Lawlor et al. (2020)<sup>28</sup> on third wave cognitive behavioural therapies for weight management against this review's eligibility criteria. In addition, we re-ran an adapted search relating to the concepts of (a) ACT and (b) overweight, obesity or weight management from the 25th of September 2019 until the 20<sup>th</sup> of June 2022. Details of the adapted search strategy are shown below.

### 1.1 MEDLINE via Ovid

|   |                                                                                                                                                                                                                                                                                                                                                                                                                                                                                                                                                                                                                          |
|---|--------------------------------------------------------------------------------------------------------------------------------------------------------------------------------------------------------------------------------------------------------------------------------------------------------------------------------------------------------------------------------------------------------------------------------------------------------------------------------------------------------------------------------------------------------------------------------------------------------------------------|
| 1 | exp Obesity/ OR exp Overweight/ OR exp Body Weight/ OR exp Body Mass Index/ OR exp Waist Circumference/ OR exp Feeding Behavior/ OR exp Body Weight Changes/ OR exp Caloric Restriction/ OR exp Weight Loss/ OR obes*.mp OR (overweight or over-weight).mp OR (weight adj3 (body or chang* or loss* or maint* or manag* or control* or reduct*)).mp OR (food adj3 (intake or habit*)).mp OR (body mass index or bmi).mp OR body adj3 mass.mp OR (calori* adj3 (restrict* or restrain* or reduc*)).mp OR feeding adj3 behavio*.mp OR (diet* adj3 (restrict* or restrain* or reduc*)).mp OR (waist* adj3 circumferenc*).mp |
| 2 | "Acceptance and Commitment Therapy"/ OR (acceptance* adj3 (commit* or mind* or base* or focus* or intervention* or therap* or treat*)).mp                                                                                                                                                                                                                                                                                                                                                                                                                                                                                |
| 3 | 1 AND 2                                                                                                                                                                                                                                                                                                                                                                                                                                                                                                                                                                                                                  |
| 4 | Limit 3 to dt=20190925-20220620                                                                                                                                                                                                                                                                                                                                                                                                                                                                                                                                                                                          |
| 5 | Limit 3 to rd=20190925-20220620                                                                                                                                                                                                                                                                                                                                                                                                                                                                                                                                                                                          |
| 6 | 4 OR 5                                                                                                                                                                                                                                                                                                                                                                                                                                                                                                                                                                                                                   |

### 1.2 EMBASE via Ovid

|   |                                                                                                                                                                                                                                                                                                                                                                                                                                                                                                                                                                              |
|---|------------------------------------------------------------------------------------------------------------------------------------------------------------------------------------------------------------------------------------------------------------------------------------------------------------------------------------------------------------------------------------------------------------------------------------------------------------------------------------------------------------------------------------------------------------------------------|
| 1 | exp Obesity/ OR exp Body Weight/ OR exp Body Mass/ OR exp Waist Circumference/ OR exp Feeding Behavior/ OR exp Caloric Restriction/ OR exp Weight Reduction/ OR obes*.mp OR (overweight or over-weight).mp OR (weight adj3 (body or chang* or loss* or maint* or manag* or control* or reduct*)).mp OR (food adj3 (intake or habit*)).mp OR (body mass index or bmi).mp OR (body adj3 mass).mp OR (calori* adj3 (restrict* or restrain* or reduc*)).mp OR (feeding adj3 behavio*).mp OR (diet* adj3 (restrict* or restrain* or reduc*)).mp OR (waist* adj3 circumferenc*).mp |
| 2 | "acceptance and commitment therapy"/ OR (acceptance* adj3 (commit* or mind* or base* or focus* or intervention* or therap* or treat*)).mp                                                                                                                                                                                                                                                                                                                                                                                                                                    |
| 3 | 1 AND 2                                                                                                                                                                                                                                                                                                                                                                                                                                                                                                                                                                      |
| 4 | Limit 3 to dd=20190925-20220620                                                                                                                                                                                                                                                                                                                                                                                                                                                                                                                                              |
| 5 | Limit 3 to rd=20190925-20220620                                                                                                                                                                                                                                                                                                                                                                                                                                                                                                                                              |
| 6 | 4 OR 5                                                                                                                                                                                                                                                                                                                                                                                                                                                                                                                                                                       |

### 1.3 AMED via Ovid

|   |                                                                                                                                                                                                                                                                                                                                                                                                                                                                                          |
|---|------------------------------------------------------------------------------------------------------------------------------------------------------------------------------------------------------------------------------------------------------------------------------------------------------------------------------------------------------------------------------------------------------------------------------------------------------------------------------------------|
| 1 | exp Obesity/ or exp Body Weight/ or exp Body Mass Index/ or exp Weight Loss/ or obes*.mp or (overweight or over-weight).mp or (weight adj3 (body or chang* or loss* or maint* or manag* or control* or reduct*)).mp or (food adj3 (intake or habit*)).mp or (body mass index or bmi).mp or body adj3 mass.mp or (calori* adj3 (restrict* or restrain* or reduc*)).mp or feeding adj3 behavio*.mp or (diet* adj3 (restrict* or restrain* or reduc*)).mp or (waist* adj3 circumferenc*).mp |
|---|------------------------------------------------------------------------------------------------------------------------------------------------------------------------------------------------------------------------------------------------------------------------------------------------------------------------------------------------------------------------------------------------------------------------------------------------------------------------------------------|

|          |                                                                                                   |
|----------|---------------------------------------------------------------------------------------------------|
| <b>2</b> | (acceptance* adj3 (commit* or mind* or base* or focus* or intervention* or therap* or treat*)).mp |
| <b>3</b> | 1 AND 2                                                                                           |
| <b>4</b> | Limit 3 to 2018-Current                                                                           |

## 1.4 CENTRAL via Cochrane

|            |                                                                                                                          |        |
|------------|--------------------------------------------------------------------------------------------------------------------------|--------|
| <b>#1</b>  | MeSH descriptor: [Obesity] explode all trees                                                                             | 15762  |
| <b>#2</b>  | MeSH descriptor: [Overweight] explode all trees                                                                          | 18878  |
| <b>#3</b>  | MeSH descriptor: [Body Weight] explode all trees                                                                         | 31138  |
| <b>#4</b>  | MeSH descriptor: [Body Mass Index] explode all trees                                                                     | 10927  |
| <b>#5</b>  | MeSH descriptor: [Waist Circumference] explode all trees                                                                 | 1143   |
| <b>#6</b>  | MeSH descriptor: [Feeding Behavior] explode all trees                                                                    | 9769   |
| <b>#7</b>  | MeSH descriptor: [Body Weight Changes] explode all trees                                                                 | 9695   |
| <b>#8</b>  | MeSH descriptor: [Caloric Restriction] explode all trees                                                                 | 941    |
| <b>#9</b>  | MeSH descriptor: [Weight Loss] explode all trees                                                                         | 7104   |
| <b>#10</b> | obes* in All Text                                                                                                        | 51603  |
| <b>#11</b> | (overweight or over-weight)                                                                                              | 19265  |
| <b>#12</b> | (weight near/3 (body or chang* or loss* or maint* or manag* or control* or reduct*))                                     | 75571  |
| <b>#13</b> | (food near/3 (intake or habit*))                                                                                         | 11473  |
| <b>#14</b> | (body mass index or bmi)                                                                                                 | 74353  |
| <b>#15</b> | (body near/3 mass)                                                                                                       | 64975  |
| <b>#16</b> | (calori* near/3 (restrict* or restrain* or reduc*))                                                                      | 3305   |
| <b>#17</b> | feeding near/3 behavio*                                                                                                  | 5662   |
| <b>#18</b> | (diet* near/3 (restrict* or restrain* or reduc*))                                                                        | 15513  |
| <b>#19</b> | (waist* near/3 circumferenc*)                                                                                            | 10789  |
| <b>#20</b> | #1 or #2 or #3 or #4 or #5 or #6 or #7 or #8 or #9 or #10 or #11 or #12 or #13 or #14 or #15 or #16 or #17 or #18 or #19 | 171531 |
| <b>#21</b> | MeSH descriptor: [Acceptance and Commitment Therapy] explode all trees                                                   | 281    |
| <b>#22</b> | (acceptance* near/3 (commit* or mind* or base* or focus* or intervention* or therap* or treat*))                         | 2898   |
| <b>#23</b> | #21 or #22                                                                                                               | 2898   |
| <b>#24</b> | #20 and #23                                                                                                              | 324    |
|            | (with Cochrane Library publication date from Aug 2019 to Jun 2022)<br>Apply limits > Select limits > Run search          | 132    |

## 1.5 ASSIA via ProQuest

MAINSUBJECT.EXACT.EXPLODE("Obesity") OR MAINSUBJECT.EXACT.EXPLODE("Body weight") OR MAINSUBJECT.EXACT.EXPLODE("Body Mass Index") OR

|                                                                                                                                                                                                                                                                                                                                                                                                                                                                                                                           |
|---------------------------------------------------------------------------------------------------------------------------------------------------------------------------------------------------------------------------------------------------------------------------------------------------------------------------------------------------------------------------------------------------------------------------------------------------------------------------------------------------------------------------|
| MAINSUBJECT.EXACT.EXPLODE("Feeding patterns") OR<br>MAINSUBJECT.EXACT.EXPLODE("Caloric intake") OR obes* OR overweight OR over-weight<br>OR (weight NEAR/3 (body or chang* or loss* or maint* or manag* or control* or reduct*)) OR<br>(food NEAR/3 (intake or habit*)) OR ("body mass index" or bmi) OR (body NEAR/3 mass) OR<br>(calori* NEAR/3 (restrict* or restrain* or reduc*)) OR (feeding NEAR/3 (pattern* or behavio*))<br>OR (diet* NEAR/3 (restrict* or restrain* or reduc*)) OR (waist* NEAR/3 circumferenc*) |
| AND                                                                                                                                                                                                                                                                                                                                                                                                                                                                                                                       |
| acceptance* NEAR/3 (commit* or mind* or base* or focus* or intervention* or therap* or treat*)                                                                                                                                                                                                                                                                                                                                                                                                                            |
| Limit by publication date (2019-09-25 to 2022-06-21)                                                                                                                                                                                                                                                                                                                                                                                                                                                                      |

## 1.6 PSYCINFO via ProQuest

|                                                                                                                                                                                                                                                                                                                                                                                                                                                                                                                                                                                                                                                                                                    |
|----------------------------------------------------------------------------------------------------------------------------------------------------------------------------------------------------------------------------------------------------------------------------------------------------------------------------------------------------------------------------------------------------------------------------------------------------------------------------------------------------------------------------------------------------------------------------------------------------------------------------------------------------------------------------------------------------|
| MAINSUBJECT.EXACT.EXPLODE("Obesity") OR MAINSUBJECT.EXACT.EXPLODE("Body Weight") OR MAINSUBJECT.EXACT.EXPLODE("Body Mass Index") OR<br>MAINSUBJECT.EXACT.EXPLODE("Eating Behavior") OR<br>MAINSUBJECT.EXACT.EXPLODE("Food Intake") OR<br>MAINSUBJECT.EXACT.EXPLODE("Diets") OR obes* OR overweight OR over-weight OR<br>(weight NEAR/3 (body or chang* or loss* or maint* or manag* or control* or reduct*)) OR (food NEAR/3 (intake or habit*)) OR ("body mass index" or bmi) OR (body NEAR/3 mass) OR<br>(calori* NEAR/3 (restrict* or restrain* or reduc*)) OR (feeding NEAR/3 (pattern* or behavio*))<br>OR (diet* NEAR/3 (restrict* or restrain* or reduc*)) OR (waist* NEAR/3 circumferenc*) |
| AND                                                                                                                                                                                                                                                                                                                                                                                                                                                                                                                                                                                                                                                                                                |
| MAINSUBJECT.EXACT.EXPLODE("Acceptance and Commitment Therapy") OR acceptance* NEAR/3 (commit* or mind* or base* or focus* or intervention* or therap* or treat*)                                                                                                                                                                                                                                                                                                                                                                                                                                                                                                                                   |
| Filtered by 2019-09-25 - 2022-06-21                                                                                                                                                                                                                                                                                                                                                                                                                                                                                                                                                                                                                                                                |

## 1.7 WEB OF SCIENCE via web of science

|                                                                                                                                                                                                                                                                                                                                                                                                                                     |
|-------------------------------------------------------------------------------------------------------------------------------------------------------------------------------------------------------------------------------------------------------------------------------------------------------------------------------------------------------------------------------------------------------------------------------------|
| (TS=(obes*) OR TS=(overweight or over-weight) OR TS=(weight NEAR/3 (body or chang* or loss* or maint* or manag* or control* or reduct*)) OR TS=(food NEAR/3 (intake or habit*)) OR<br>TS=("body mass index" or bmi) OR TS=(body NEAR/3 mass) OR TS=(calori* NEAR/3 (restrict* or restrain* or reduc*)) OR TS=(feeding NEAR/3 behavio*) OR TS=(diet* NEAR/3 (restrict* or restrain* or reduc*)) OR TS=(waist* NEAR/3 circumferenc*)) |
| AND                                                                                                                                                                                                                                                                                                                                                                                                                                 |
| (TS=(acceptance* NEAR/3 (commit* or mind* or base* or focus* or intervention* or therap* or treat*)))                                                                                                                                                                                                                                                                                                                               |
| Refined by: PUBLICATION date (2019-09-25 to 2022-06-20)                                                                                                                                                                                                                                                                                                                                                                             |

## 1.8 CINAHL via EBSCOhost

|                                                                                                                                                                                                                                                                                                                                                                                                                                                                                                                                                                                                                                             |
|---------------------------------------------------------------------------------------------------------------------------------------------------------------------------------------------------------------------------------------------------------------------------------------------------------------------------------------------------------------------------------------------------------------------------------------------------------------------------------------------------------------------------------------------------------------------------------------------------------------------------------------------|
| ((MH "Obesity+") OR (MH "Body Weight+") OR (MH "Eating Behavior+") OR (MH "Body Weight Changes+") OR (MH "Weight Loss+") OR (MH "Body Mass Index") OR (MH "Waist Circumference") OR (MH "Weight Reduction Programs") OR (TX obes*) OR (TX (overweight or over-weight)) OR (TX (weight N3 (body or chang* or loss* or maint* or manag* or control* or reduct*))) OR (TX (food N3 (intake or habit*))) OR (TX (body mass index or bmi)) OR (TX (body N3 mass)) OR (TX (calori* N3 (restrict* or restrain* or reduc*))) OR (TX (feeding N3 behavio*)) OR (TX (diet* N3 (restrict* or restrain* or reduc*))) OR (TX (waist* N3 circumferenc*))) |
| AND                                                                                                                                                                                                                                                                                                                                                                                                                                                                                                                                                                                                                                         |
| ((MH "Acceptance and Commitment Therapy") OR (TX (acceptance* N3 (commit* or mind* or base* or focus* or intervention* or therap* or treat*))))                                                                                                                                                                                                                                                                                                                                                                                                                                                                                             |
| Limiters - Published Date: 20190801-20220631                                                                                                                                                                                                                                                                                                                                                                                                                                                                                                                                                                                                |

2.0 Data extraction form

2.1 Top-line details

|                                               |  |
|-----------------------------------------------|--|
| ID of data extractor                          |  |
| Covidence ID                                  |  |
| References (Author, Publication year, Titles) |  |
| Trial ID (if provided)                        |  |

2.2 Study characteristics

2.2.1 Methods

|                                                                                                         |                    |  |
|---------------------------------------------------------------------------------------------------------|--------------------|--|
| Design                                                                                                  |                    |  |
| Study start date                                                                                        |                    |  |
| Study end date                                                                                          |                    |  |
| Recruitment i.e. where and how recruited (online, proactive telephone etc)                              |                    |  |
| Setting (e.g. clinical, commercial, workplace, etc.)                                                    |                    |  |
| Country                                                                                                 |                    |  |
| Inclusion/exclusion criteria                                                                            | Inclusion criteria |  |
|                                                                                                         | Exclusion criteria |  |
| Inclusion based on specific population characteristic? (e.g. pre-existing condition, gender, ethnicity) |                    |  |

2.2.2 Notes

|                                                                             |  |
|-----------------------------------------------------------------------------|--|
| Funding statement (copy verbatim)                                           |  |
| Declarations of interest statement (copy verbatim)                          |  |
| Any other notes to be included in characteristics of included studies table |  |

2.2.3 Participants (at baseline)

|                                                             |  |
|-------------------------------------------------------------|--|
| Total N randomized                                          |  |
| N per arm/group (where relevant)                            |  |
| Total % Female                                              |  |
| Total mean age                                              |  |
| Total mean baseline BMI                                     |  |
| Total mean baseline EE (emotional eating)                   |  |
| Total mean baseline UE (uncontrolled eating/ disinhibition) |  |
| Total mean baseline R (restraint)                           |  |
| Total mean baseline other EBTs (rename as appropriate)      |  |

2.2.4 Interventions

(where multiple arms, copy and paste for each arm)

|                                                            |                                                                  |  |
|------------------------------------------------------------|------------------------------------------------------------------|--|
| Any shared aspects between intervention and control groups | Target behaviour (e.g. physical activity or nutrition)           |  |
|                                                            | Mode of Delivery (e.g. group vs individual, online vs in person) |  |
|                                                            | Duration & Frequency & Intensity (Dose)                          |  |
|                                                            | Shared Intervention Content/ Components                          |  |
| Comparison Arm (rename as needed)                          | Target behaviour (e.g. physical activity or nutrition)           |  |
|                                                            | Mode of Delivery (e.g. group vs individual, online vs in person) |  |
|                                                            | Duration & Frequency & Intensity (Dose)                          |  |
|                                                            | Behaviour change strategies                                      |  |
|                                                            | Other intervention details                                       |  |
| Intervention Arm (rename as needed)                        | Target behaviour (e.g. physical activity or nutrition)           |  |
|                                                            | Mode of Delivery (e.g. group vs individual, online vs in person) |  |

|  |                                                                                     |  |
|--|-------------------------------------------------------------------------------------|--|
|  | Duration & Frequency & Intensity (Dose)                                             |  |
|  | Behaviour change strategies                                                         |  |
|  | ACT components (add key terms, e.g. cognitive defusion, urge surfing, values, etc.) |  |
|  | Other intervention details                                                          |  |

2.3 Mediators/Moderators/Outcomes

|                                                                              |  |
|------------------------------------------------------------------------------|--|
| How EBTs were measured/defined (which questionnaire was used, with citation) |  |
| When EBTs were measured                                                      |  |
| How weight outcome was measured (e.g. self-report vs objective etc.)         |  |
| When outcome was measured                                                    |  |
